# Supplementary material for: Investigating Markers of the NLRP3 Inflammasome Pathway in Alzheimer’s Disease: A Human Post-Mortem Study
Source: MDPI journal article supplement (doi:10.3390/genes12111753), 2021-10-30
Supplement: s1 [file s1]

## Supplementary Table S2

**Table S2. Overview of genes and corresponding primer pairs for reverse transcriptase quantitative real-time PCR.**

| Gene symbol                        | Accession no. | Primer sequence (5'-3') |                           | Location of amplicon | Exon junction span | Bp  | E (%) | R <sup>2</sup> | Slope  | Ta   |
|------------------------------------|---------------|-------------------------|---------------------------|----------------------|--------------------|-----|-------|----------------|--------|------|
| Reference Genes                    |               |                         |                           |                      |                    |     |       |                |        |      |
| ACTB                               | NM_001101     | Sense:                  | AGAGCTACGAGCTGCCTGAC      | 797.....816          | Yes                | 184 | 97.7  | 0.990          | -3.377 | 65.8 |
|                                    |               | Anti-sense:             | AGCACTGTGTTGGCGTACAG      | 980.....961          |                    |     |       |                |        |      |
| RPL13                              | NM_012423     | Sense:                  | AGCCTACAAGAAAGTTTGCCTAT   | 411.....433          | Yes                | 126 | 98.7  | 0.996          | -3.354 | 63.3 |
|                                    |               | Anti-sense:             | TCTTCTTCCGGTAGTGGATCTTGGC | 536.....512          |                    |     |       |                |        |      |
| PPIA                               | NM_021130     | Sense:                  | TCCTGGCATCTTGTCCATG       | 326.....344          | Yes                | 90  | 96.6  | 0.963          | -3.406 | 62.7 |
|                                    |               | Anti-sense:             | CCATCCAACCACTCAGTCTTG     | 415.....395          |                    |     |       |                |        |      |
| UBE2D2                             | NM_003339     | Sense:                  | TGCCTGAGATTGCTCGGATCT     | 812.....832          | Yes                | 81  | 105.5 | 0.993          | -3.197 | 65.0 |
|                                    |               | Anti-sense:             | TCGCATACTTCTGAGTCCATTCC   | 892.....870          |                    |     |       |                |        |      |
| GADPH                              | NM_002046     | Sense:                  | CCTGCACCACCAACTGCTTA      | 528.....547          | Yes                | 109 | 105.9 | 0.994          | -3.189 | 65.7 |
|                                    |               | Anti-sense:             | GTCTTCTGGGTGGCAGTGATG     | 636.....616          |                    |     |       |                |        |      |
| GPS1                               | NM_212492     | Sense:                  | CGTGCCCTCATCCAGTATTTTC    | 1664.....1684        | Yes                | 52  | 86.4  | 0.994          | -3.697 | 63.8 |
|                                    |               | Anti-sense:             | TCCTATGCATGTCGGCTGAC      | 1715.....1696        |                    |     |       |                |        |      |
| Targeted genes in the NLRP3 system |               |                         |                           |                      |                    |     |       |                |        |      |
| NLRP3                              | NM_004895     | Sense:                  | GATCTTCGCTGCGATCAACAG     | 965.....985          | Yes                | 81  | 105.2 | 0.999          | -3.203 | 64.2 |

|                                 |              |             |                          |               |     |     |       |       |        |      |
|---------------------------------|--------------|-------------|--------------------------|---------------|-----|-----|-------|-------|--------|------|
|                                 |              | Anti-sense: | CGTGCATTATCTGAACCCAC     | 1045.....1025 |     |     |       |       |        |      |
| PYCARD                          | NM_145182    | Sense:      | ATCCAGGCCCTCCTCAGTC      | 368.....387   | Yes | 85  | 93.6  | 0.999 | -3.485 | 65.4 |
|                                 |              | Anti-sense: | TTGTGACCCTCGCGATAAGC     | 452.....433   |     |     |       |       |        |      |
| CASP1                           | NM_001257118 | Sense:      | GAAGGCATTTGTGGGAAGAA     | 752.....771   | Yes | 424 | 92.2  | 0.998 | -3.524 | 61.6 |
|                                 |              | Anti-sense: | CATCTGGCTGCTCAAATGAA     | 1175.....1156 |     |     |       |       |        |      |
| IL18                            | NM_001562    | Sense:      | CGCTTCCTCTCGCAACAAAC     | 158.....177   | Yes | 143 | 105.0 | 0.986 | -3.208 | 64.7 |
|                                 |              | Anti-sense: | ATTCCAGGTTTTATCATCTTCAGC | 300.....276   |     |     |       |       |        |      |
| IL 1B                           | NM_000576    | Sense:      | GGCTGCTCTGGGATTCTCTTC    | 32.....52     | Yes | 98  | 91.3  | 0.999 | -3.549 | 64.3 |
|                                 |              | Anti-sense: | ATAAGCCATCATTTCACTGGCG   | 129.....108   |     |     |       |       |        |      |
| <b>Glial activation markers</b> |              |             |                          |               |     |     |       |       |        |      |
| HLA-DRA                         | NM_019111    | Sense:      | GACAAGTTCACCCCACCAGT     | 467.....486   | No  | 115 | 106.9 | 0.999 | -3.165 | 65.2 |
|                                 |              | Anti-sense: | ACTTGCGGAAAAGGTGGTCT     | 581.....562   |     |     |       |       |        |      |
| AIF1                            | NM_001623    | Sense:      | TGTCTCCCCACCTCTACCAG     | 64.....83     | Yes | 109 | 99.66 | 0.977 | -3.330 | 65.3 |
|                                 |              | Anti-sense: | CATCCAGCCTCTCTTCCTGC     | 172.....153   |     |     |       |       |        |      |
| GFAP                            | NM_002055    | Sense:      | CCCTCACCAAATTCCACCCG     | 3138.....3157 | No  | 91  | 109.4 | 0.995 | -3.116 | 65.2 |
|                                 |              | Anti-sense: | TTGAGTTGCAGGTAGCAGGG     | 3228.....3209 |     |     |       |       |        |      |

Bp: length of the amplicon in base pair; E: amplification efficiency; R<sup>2</sup>: coefficient of correlation; Ta: annealing temperature.
