# Supplementary material for: Investigating Markers of the NLRP3 Inflammasome Pathway in Alzheimer’s Disease: A Human Post-Mortem Study
Source: MDPI journal article supplement (doi:10.3390/genes12111753), 2021-10-30
Supplement: s1 [file s1]

## Supplementary Figure S1

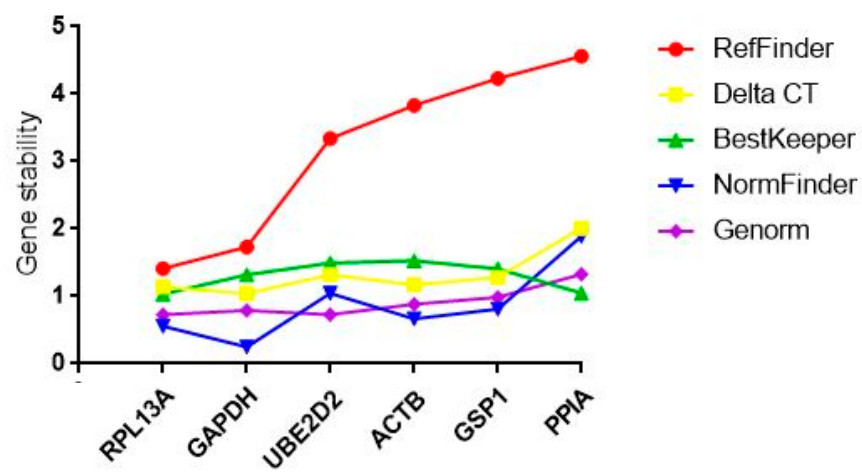

**Figure S1: Reference gene stability rankings summarized by RefFinder.** Lower ranking indicates higher stability.
