# Supplementary material for: Investigating Markers of the NLRP3 Inflammasome Pathway in Alzheimer’s Disease: A Human Post-Mortem Study
Source: MDPI journal article supplement (doi:10.3390/genes12111753), 2021-10-30
Supplement: s1 [file s1]

## Supplementary Table S1

**Table S1:** MIQE checklist for RT-qPCR experiment.

| ITEM TO CHECK                                        | IMPORTANCE | COMMENTS                                                                                               |
|------------------------------------------------------|------------|--------------------------------------------------------------------------------------------------------|
| <b>EXPERIMENTAL DESIGN</b>                           |            |                                                                                                        |
| Definition of experimental and control groups        | E          | Materials & Methods; Table 1                                                                           |
| Number within each group                             | E          | 40 AD & 20 controls                                                                                    |
| Assay carried out by core lab or investigator's lab? | D          | Investigator's lab                                                                                     |
| Acknowledgement of authors' contributions            | D          | Yes                                                                                                    |
| <b>SAMPLE</b>                                        |            |                                                                                                        |
| Description                                          | E          | Frozen postmortem brain tissue                                                                         |
| Volume/mass of sample processed                      | D          | 40-60 mg                                                                                               |
| Microdissection or macrodissection                   | E          | Macro                                                                                                  |
| Processing procedure                                 | E          | Materials & Methods                                                                                    |
| If frozen - how and how quickly?                     | E          | Frozen at -80°C after post-mortem delay; Table 1                                                       |
| If fixed - with what, how quickly?                   | E          | Unfixed                                                                                                |
| Sample storage conditions and duration               | E          | Stored at -80°C in brain bank of Salford Royal Foundation Trust hospital                               |
| <b>NUCLEIC ACID EXTRACTION</b>                       |            |                                                                                                        |
| Procedure and/or instrumentation                     | E          | Materials & Methods                                                                                    |
| Name of kit and details of any modifications         | E          | TRIzol™ Reagent (Thermo Fisher) & Monarch® RNA Cleanup Kit (New England Biolabs) ; Materials & Methods |
| Source of additional reagents used                   | D          | Materials & Methods                                                                                    |
| Details of DNase or RNase treatment                  | E          | ND; DNA contamination is tested & primers are exon junction span                                       |

|                                                          |    |                                                                                              |
|----------------------------------------------------------|----|----------------------------------------------------------------------------------------------|
| Contamination assessment (DNA or RNA)                    | E  | DNA contamination assessment by qPCR without RT step                                         |
| Nucleic acid quantification                              | E  | RNA quantification performed                                                                 |
| Instrument and method                                    | E  | NanoDrop™ (Thermo Fisher Scientific Inc)                                                     |
| Purity (A260/A280)                                       | D  | NanoDrop™ (Thermo Fisher Scientific Inc)                                                     |
| Yield                                                    | D  | NanoDrop™ (Thermo Fisher Scientific Inc)                                                     |
| RNA integrity method/instrument                          | E  | RNA integrity number (RIN) was assessed by Agilent 2200 TapeStation System                   |
| RIN/RQI or Cq of 3' and 5' transcripts                   | E  | RIN was assessed                                                                             |
| Electrophoresis traces                                   | D  | Native agarose gel electrophoresis traces                                                    |
| Inhibition testing (Cq dilutions, spike or other)        | E  | Serial dilution was performed                                                                |
| <b>REVERSE TRANSCRIPTION</b>                             |    |                                                                                              |
| Complete reaction conditions                             | E  | Materials & Methods                                                                          |
| Amount of RNA and reaction volume                        | E  | 500 ng of RNA in a 20 µl reaction                                                            |
| Priming oligonucleotide (if using GSP) and concentration | E  | 2X RT Reaction Mix includes oligo(dT)20 (2.5 µM) & random hexamers (2.5 ng/µL)               |
| Reverse transcriptase and concentration                  | E  | Invitrogen SuperScript III First-Strand Synthesis Supermix for qRT-PCR                       |
| Temperature and time                                     | E  | According to manufacturer's instructions                                                     |
| Manufacturer of reagents and catalogue numbers           | D  | SuperScript III First-Strand Synthesis Supermix for qRT-PCR / Thermo Fisher Cat No.11752-050 |
| Cqs with and without RT                                  | D* | See Results for details                                                                      |
| Storage conditions of cDNA                               | D  | cDNA stored at -20°C                                                                         |
| <b>qPCR TARGET INFORMATION</b>                           |    |                                                                                              |
| If multiplex, efficiency and LOD of each assay           | E  | Not multiplex. PCR efficiencies were given in Results                                        |
| Sequence accession number                                | E  | Yes                                                                                          |
| Location of amplicon                                     | D  | Table 2                                                                                      |

|                                                           |     |                                                  |
|-----------------------------------------------------------|-----|--------------------------------------------------|
| Amplicon length                                           | E   | Confirmed by electrophoresis                     |
| In silico specificity screen (BLAST, etc)                 | E   | Yes                                              |
| Pseudogenes, retropseudogenes or other homologs?          | D   | NA                                               |
| Sequence alignment                                        | D   | NA                                               |
| Secondary structure analysis of amplicon                  | D   | NA                                               |
| Location of each primer by exon or intron (if applicable) | E   | Table 2                                          |
| What splice variants are targeted?                        | E   | Table 2                                          |
| <b>qPCR OLIGONUCLEOTIDES</b>                              |     |                                                  |
| Primer sequences                                          | E   | Table 2                                          |
| RTPrimerDB Identification Number                          | D   | NA                                               |
| Probe sequences                                           | D** | NA                                               |
| Location and identity of any modifications                | E   | None                                             |
| Manufacturer of oligonucleotides                          | D   | Thermo Fisher                                    |
| Purification method                                       | D   | Desalted                                         |
| <b>qPCR PROTOCOL</b>                                      |     |                                                  |
| Complete reaction conditions                              | E   | Materials and Methods                            |
| Reaction volume and amount of cDNA/DNA                    | E   | 10 µl reaction with 1 µL cDNA                    |
| Primer, (probe), Mg++ and dNTP concentrations             | E   | 0.25 µM each primer                              |
| Polymerase identity and concentration                     | E   | Power SYBR™ Green PCR Master Mix (Thermo Fisher) |
| Buffer/kit identity and manufacturer                      | E   | Power SYBR™ Green PCR Master Mix (Thermo Fisher) |
| Exact chemical constitution of the buffer                 | D   | Power SYBR™ Green PCR Master Mix (Thermo Fisher) |
| Additives (SYBR Green I, DMSO, etc.)                      | E   | Power SYBR™ Green PCR Master Mix (Thermo Fisher) |

|                                                          |   |                                                                              |
|----------------------------------------------------------|---|------------------------------------------------------------------------------|
| Manufacturer of plates/tubes and catalog number          | D | Applied Biosystems MicroAmp Optical 384-well reaction plate. Cat No. 4309849 |
| Complete thermocycling parameters                        | E | Materials and Methods                                                        |
| Reaction setup (manual/robotic)                          | D | Manual                                                                       |
| Manufacturer of qPCR instrument                          | E | 7900HT Real-Time PCR System (Thermo Fisher)                                  |
| <b>qPCR VALIDATION</b>                                   |   |                                                                              |
| Evidence of optimisation (from gradients)                | D | Optimisation was performed using pool cDNA                                   |
| Specificity (gel, sequence, melt, or digest)             | E | Confirmed by gel electrophoresis and melting curve                           |
| For SYBR Green I, Cq of the NTC                          | E | NTC Cq >40                                                                   |
| Standard curves with slope and y-intercept               | E | Table 2                                                                      |
| PCR efficiency calculated from slope                     | E | Yes, see Table 2                                                             |
| Confidence interval for PCR efficiency or standard error | D | NA                                                                           |
| r <sup>2</sup> of standard curve                         | E | approximately 0.99                                                           |
| Linear dynamic range                                     | E | NA                                                                           |
| Cq variation at lower limit                              | E | ND                                                                           |
| Confidence intervals throughout range                    | D | ND                                                                           |
| Evidence for limit of detection                          | E | NA                                                                           |
| If multiplex, efficiency and LOD of each assay           | E | Not multiplex                                                                |
| <b>DATA ANALYSIS</b>                                     |   |                                                                              |
| qPCR analysis program (source, version)                  | E | 7900HT Real-Time PCR System Software                                         |
| Cq method determination                                  | E | Automatic baseline setting and manual threshold setting                      |
| Outlier identification and disposition                   | E | Yes                                                                          |
| Results of NTCs                                          | E | >40 cycles                                                                   |

|                                                       |   |                                                                                            |
|-------------------------------------------------------|---|--------------------------------------------------------------------------------------------|
| Justification of number and choice of reference genes | E | Two reference gene transcripts used. Validation by RefFinder ranking of the six candidates |
| Description of normalisation method                   | E | 2- $\Delta\Delta C_t$ method by normalisation against RPL13A and GAPDH                     |
| Number and concordance of biological replicates       | D | Materials and Methods                                                                      |
| Number and stage (RT or qPCR) of technical replicates | E | Materials and Methods                                                                      |
| Repeatability (intra-assay variation)                 | E | Standard deviation of triplicates <0.2                                                     |
| Reproducibility (inter-assay variation, %CV)          | D | Analysed with raw C <sub>q</sub> value of RGs.                                             |
| Power analysis D                                      | D | NA                                                                                         |
| Statistical methods for result significance           | E | Materials and Methods                                                                      |

\* Assessing the absence of DNA using a no RT assay is essential when first extracting RNA. Once the sample has been validated as DNA-free, inclusion of a no-RT control is desirable, but no longer essential. \*\* Disclosure of the probe sequence is highly desirable and strongly encouraged. E = essential information; D = desirable information; NA = not applicable; ND = not done.
