# Supplementary material for: Investigating Markers of the NLRP3 Inflammasome Pathway in Alzheimer’s Disease: A Human Post-Mortem Study
Source: MDPI journal article supplement (doi:10.3390/genes12111753), 2021-10-30
Supplement: s1 [file s1]

## Supplementary Figure S2

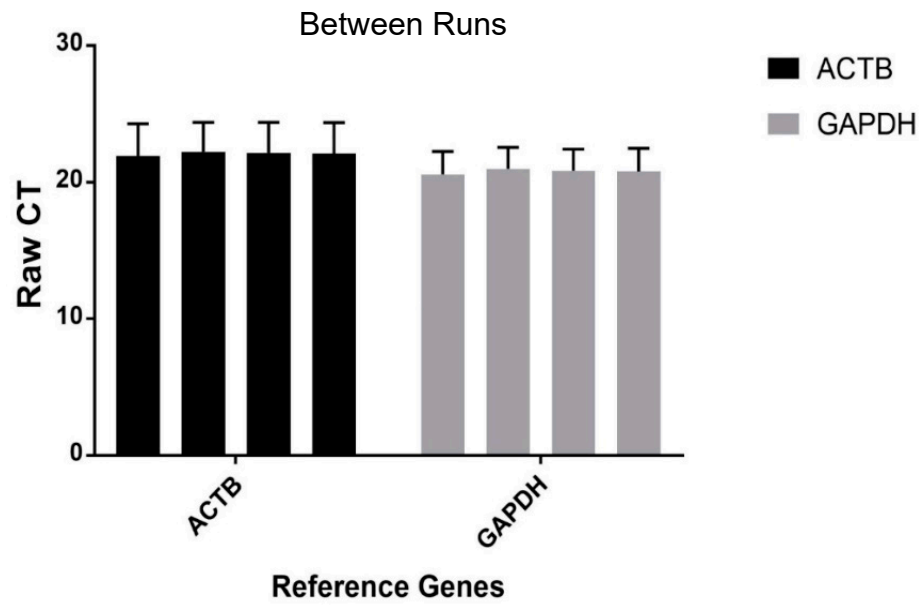

**Figure S2: Analysis of inter-assay variation.** The inter-assay variation was analysed by using raw Ct value of RGs and there was no significant variation between different RT-qPCR assays.
